# Supplementary material for: Combining Targeted Metabolomic Data with a Model of Glucose Metabolism: Toward Progress in Chondrocyte Mechanotransduction
Source: PLoS One. 2017 Jan 5;12(1):e0168326. doi: 10.1371/journal.pone.0168326 (PMC5215894; doi:10.1371/journal.pone.0168326)
Supplement: S5 Table — This list details which of the measurable and constrained metabolites were classified as internal or external to the network, along with a short rationale for each. (XLSX) [file pone.0168326.s006.xlsx]

## Sheet: Listing - List of External & In
List of External & Internal Metabolites
Metabolite	Type	Rationale
Glucose	External	Cannot distinguish between internal and extracellular glucose
ATP	External	Our model cannot account for the extensive utilization of ATP throughout the cell
Glucose-6-Phosphate	Internal	Contains a carbon skeleton from central metabolism
ADP	External	Our model cannot account for the extensive utilization of ADP throughout the cell
Fructose-6-Phosphate	Internal	Contains a carbon skeleton from central metabolism
Fructose-1,6,bisphosphate	Internal	Contains a carbon skeleton from central metabolism
dihydroxyacetone phosphate	Internal	Contains a carbon skeleton from central metabolism
glyceraldehyde-3-phosphate	Internal	Contains a carbon skeleton from central metabolism
NAD+	External	Our model cannot account for the extensive utilization of NAD+ throughout the cell
Inorganic Phosphate	Internal	Phosphates are conserved throughout our model
1,3-bisphosphoglycerate	Internal	Contains a carbon skeleton from central metabolism
NADH	External	Our model cannot account for the extensive utilization of NADH throughout the cell
H+	Internal	Protons are conserved throughout our model
3-Phosphoglycerate	Internal	Contains a carbon skeleton from central metabolism
2-Phosphoglycerate	Internal	Contains a carbon skeleton from central metabolism
Phosphoenolpyruvate	Internal	Contains a carbon skeleton from central metabolism
Water	Internal	Water is conserved throughout our model
Pyruvate	Internal	Contains a carbon skeleton from central metabolism
HS-CoA	Internal	Contains a carbon skeleton from central metabolism
Acetyl-CoA	Internal	Contains a carbon skeleton from central metabolism
Carbon Dioxide	External	Is exported out of the cell
Oxaloacetate	Internal	Contains a carbon skeleton from central metabolism
Citrate	Internal	Contains a carbon skeleton from central metabolism
Cis-aconitate	Internal	Contains a carbon skeleton from central metabolism
Isocitrate	Internal	Contains a carbon skeleton from central metabolism
Oxalosuccinate	Internal	Contains a carbon skeleton from central metabolism
Alpha-ketoglutarate	Internal	Contains a carbon skeleton from central metabolism
Succinyl CoA	Internal	Contains a carbon skeleton from central metabolism
GDP	External	Our model cannot account for the utilization of GDP throughout the cell
GTP	External	Our model cannot account for the utilization of GTP throughout the cell
Succinate	Internal	Contains a carbon skeleton from central metabolism
FAD	External	Our model cannot account for the utilization of FAD throughout the cell
Fumarate	Internal	Contains a carbon skeleton from central metabolism
FADH2	External	Our model cannot account for the utilization of FADH2 throughout the cell
L-Malate	Internal	Contains a carbon skeleton from central metabolism
p-glucanolactone	Internal	Contains a carbon skeleton from central metabolism
6-P-gluconate	Internal	Contains a carbon skeleton from central metabolism
ribulose-5-phosphate	Internal	Contains a carbon skeleton from central metabolism
ribose-5-phosphate	Internal	Contains a carbon skeleton from central metabolism
xylulose-5-phosphate	Internal	Contains a carbon skeleton from central metabolism
sedoheptulose-7-phosphate	Internal	Contains a carbon skeleton from central metabolism
Erythrose-4-phosphate	Internal	Contains a carbon skeleton from central metabolism
NADP+	External	Our model cannot account for the utilization of NADP+ throughout the cell
NADPH	External	Our model cannot account for the utilization of NADPH throughout the cell
Q	External	Our model cannot account for the utilization of ubiquinone throughout the cell
Hmatrix+	External	Our methods could not distinguish between matrix and intermatrix space protons
QH2	External	Our model cannot account for the utilization of ubiquinone throughout the cell
HIMS+	External	Our methods could not distinguish between matrix and intermatrix space protons
Cytochrome C3+	External	Our methods could not distinguish between reduced and oxidized cytochrome
Cytochrome C2+	External	Our methods could not distinguish between reduced and oxidized cytochrome
Oxygen	External	Is imported into the cell
OH	External	Our model does not account for all usage in the cell
